# Supplementary material for: Control over molar mass, dispersity, end-groups and kinetics in cyclopolymerization of ortho-phthalaldehyde: adapted choice of a phosphazene organocatalyst
Source: Royal Society of Chemistry journal article supplement (doi:10.1039/c3py01307c), 2013-11-01
Supplement: c3py01307c.pdf [file c3py01307c.pdf]

## Supporting Information

# Control over Molar mass, Dispersity, End-groups and Kinetics in Cyclopolymerization of ortho-Phthalaldehyde : Adapted Choice of Phosphazene Organocatalyst.

J. De Winter,<sup>a,b</sup> A.P. Dove,<sup>c</sup> A. Knoll,<sup>d</sup> P. Gerbaux,<sup>a</sup> Ph. Dubois<sup>b</sup> and O. Coulembier<sup>b\*</sup>

<sup>a</sup> Mass Spectrometry Research Group, Interdisciplinary Center of Mass Spectrometry (CISMa),

<sup>b</sup> Center of Innovation and Research in MAterials and Polymers (CIRMAP), Laboratory of Polymeric and Composite Materials,

University of Mons (UMONS), Place du Parc 23, Mons, B-7000, Belgium.

<sup>c</sup> Department of Chemistry University of Warwick Coventry, CV4 7AL, UK

<sup>d</sup> IBM Research GmbH Säumerstrasse 4 CH-8803 Rüschlikon Switzerland

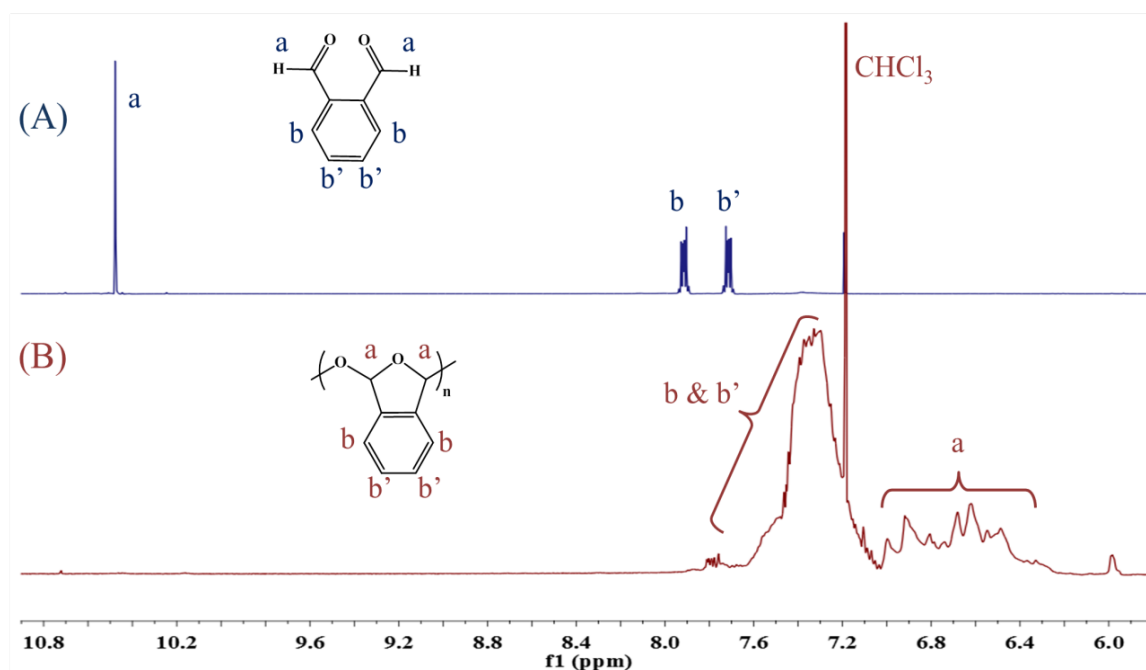

Figure SI 1, <sup>1</sup>H NMR spectra (CDCl<sub>3</sub>, 21°C, 400MHz) of both PA monomer (A) and corresponding crude PPA<sub>5</sub> sample (B).

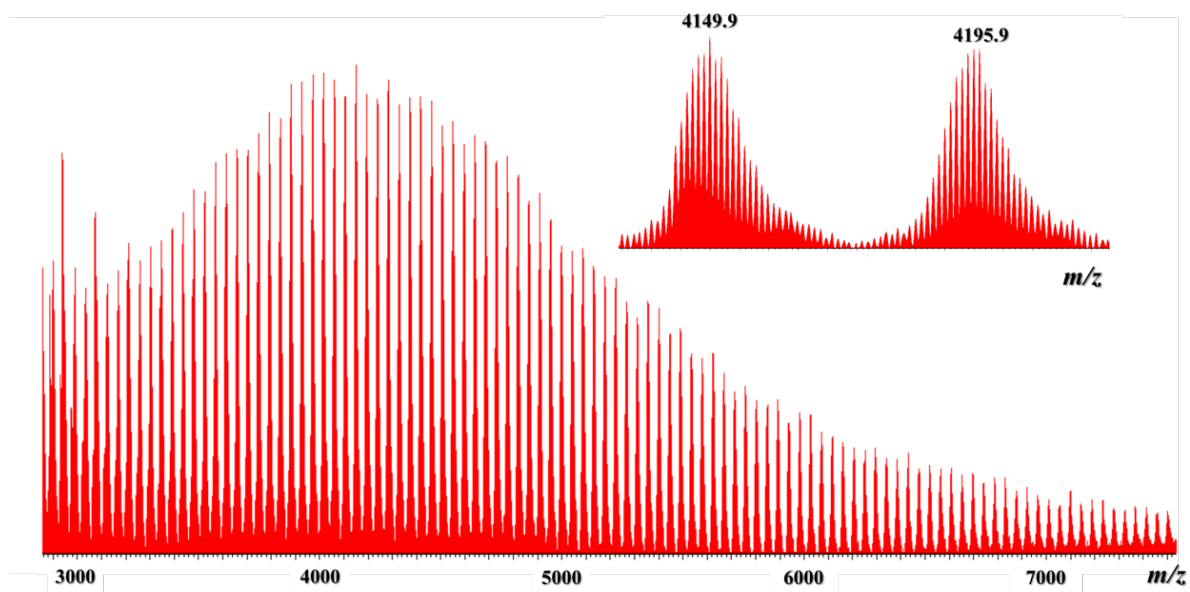

Figure SI2, MALDI-MS spectrum for the newly synthesized diblock copolymer (PPA-b-PEO).
